# Supplementary material for: Single-molecule two- and three-colour FRET studies reveal a transition state in SNARE disassembly by NSF
Source: PubMed Central journal article supplement — Nat Commun. 2025 Jan 2;16:250. doi: 10.1038/s41467-024-55531-0 (PMC11695992; doi:10.1038/s41467-024-55531-0), 2025-01-02
Supplement: 41467_2024_55531_MOESM1_ESM.pdf [file 41467_2024_55531_MOESM1_ESM.pdf]

## Supplementary Information

### **Single-molecule two- and three-colour FRET studies reveal a transition state in SNARE disassembly by NSF**

Sudheer K. Cheppali<sup>1\*</sup>, Chang Li<sup>1\*</sup>, Wenjing Xing<sup>1\*</sup>, Ruirui Sun<sup>1</sup>, Mengyi Yang<sup>1</sup>, Yi Xue<sup>2</sup>, Si-Yao Lu<sup>3</sup>, Jun Yao<sup>3</sup>, Shan Sun<sup>1†</sup>, Chunlai Chen<sup>1†</sup>, Sen-Fang Sui<sup>1,4†</sup>

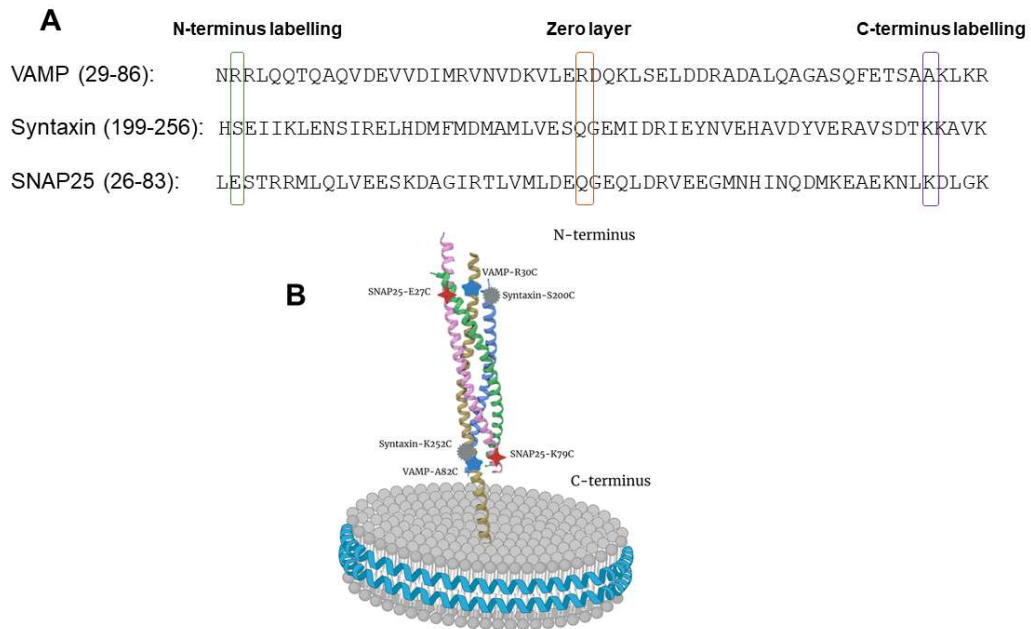

**Supplementary Fig. 1.** A) Sequence alignment and B) pictorial representation of labeled positions and labelled residues of SNARE proteins used in this study. B is created in BioRender. Cheppali, S. (2024) <https://BioRender.com/k91i311>.

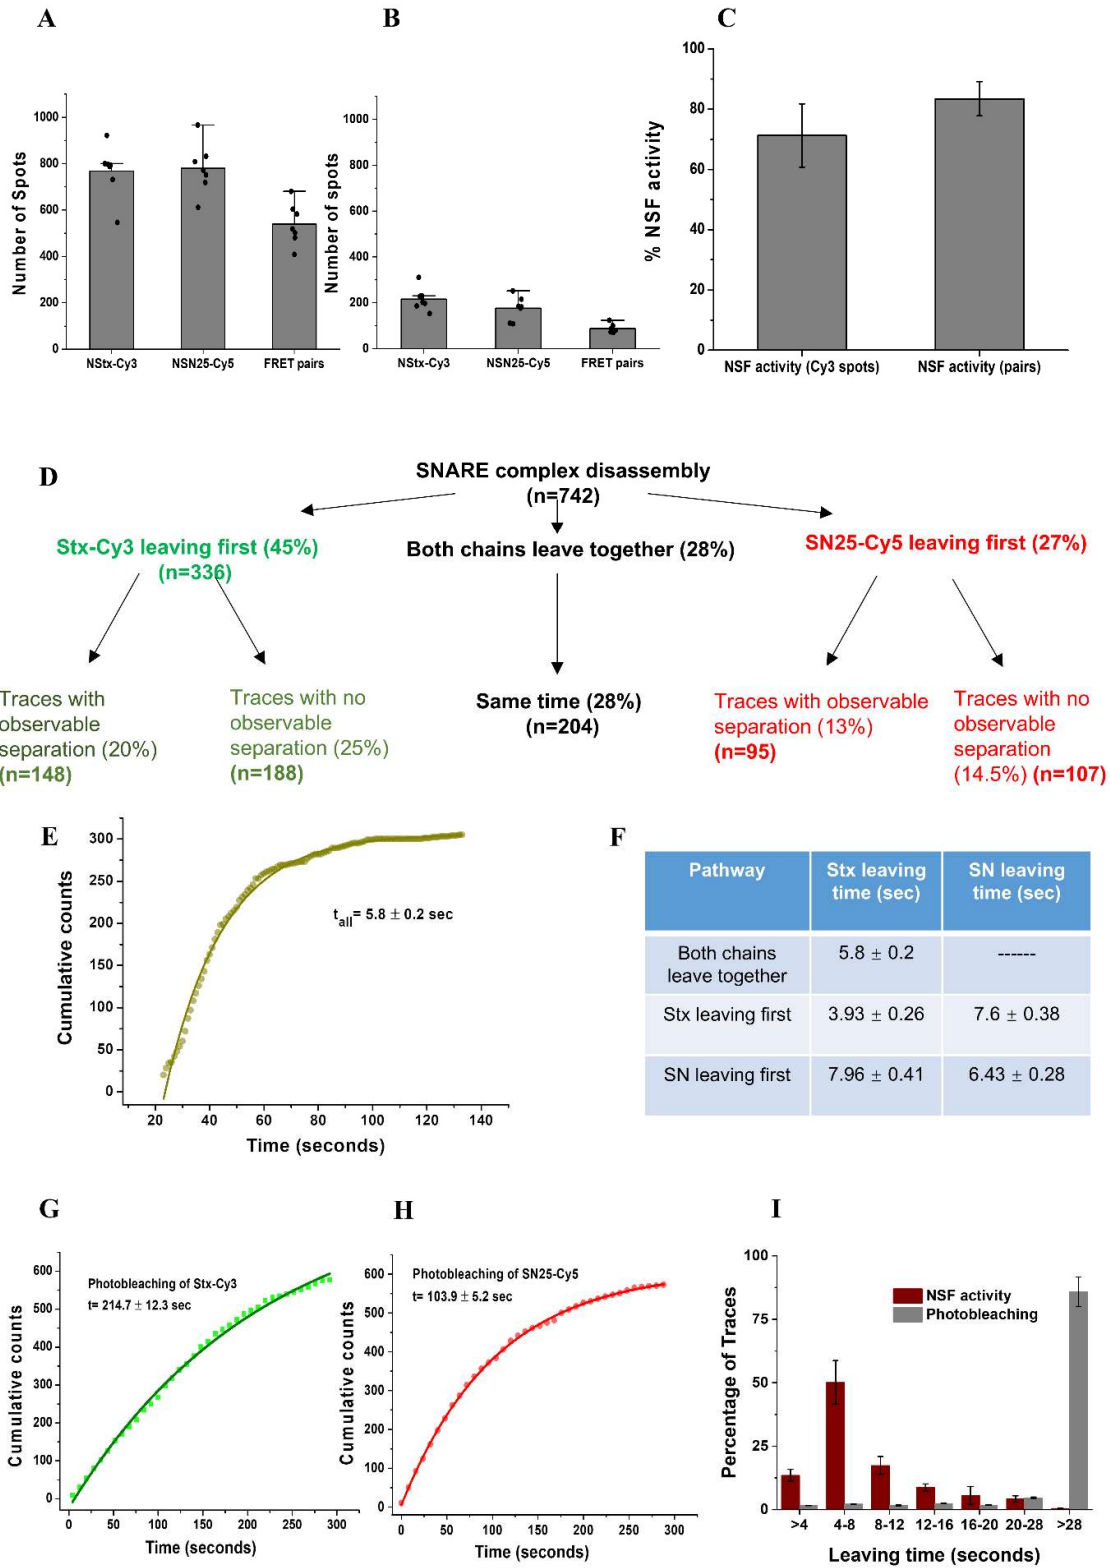

Supplementary Fig. 2. SNARE disassembly by NSF monitored using two-colour single-

**molecule FRET.** **A)** Number of NStx-Cy3 spots, NSN-Cy5 spots and NStx-NSN25 FRET pairs observed after immobilization of SNARE nanodiscs on the TIRFM surface ( $t=0$  sec). **B)** Number of NStx-Cy3 spots, NSN25-Cy5 spots and NStx-SN25 FRET pairs observed after the addition of  $\alpha$ -SNAP, NSF along with 2 mM ATP and 2 mM  $MgCl_2$  ( $t=200$  sec) ( $n=8$ , independent SNARE disassembly experiments). **C)** Percent NSF activity based on the Cy3 spots and FRET pairs from **A** and **B**, errors are statistical. **D)** Classification of single-molecule trajectories based on the individual chain leaving (disassembly) time and also observable difference in the FRET and chain leaving separately. **E)** Cumulated distribution showing average chain leaving time when all the chains leave at the same time. **F)** Chain leaving times of various classes of traces observed as shown in Fig S1D. **G, H)** Graphs showing cumulative distribution of latencies for the photobleaching of NStx-Cy3 and NSN-Cy5, respectively, in the presence of oxygen scavenging buffer. **I)** Graph showing comparative chain leaving times of SNARE disassembly by NSF and photobleaching ( $n>500$  traces in each case).

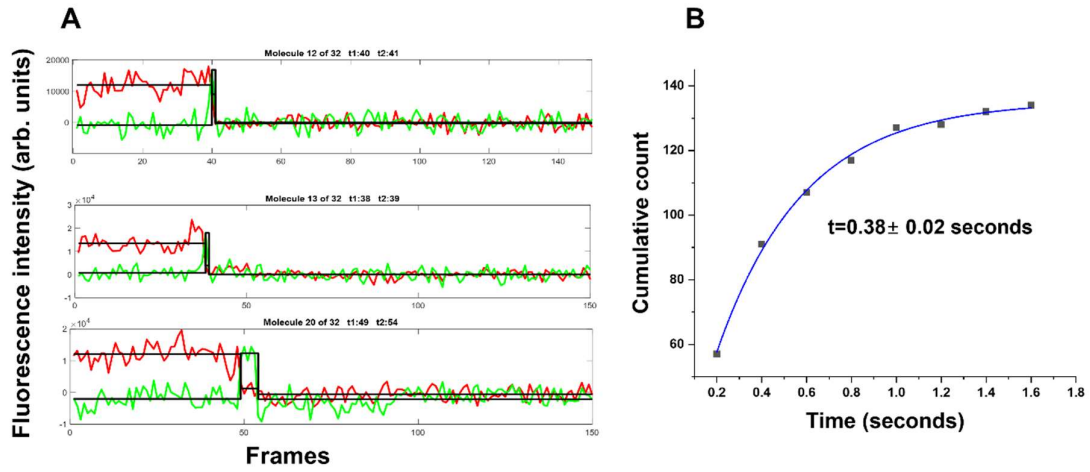

**Supplementary Fig. 3. Hidden-Markov analysis of zero-FRET transient state.** **A)** Two-color FRET example traces showing a separated zero-FRET state between NStx before its disassembly. **B)** Cumulative distribution of the transient NStx-Cy3 separated state before its disassembly showing its dwell time (n=138 traces).

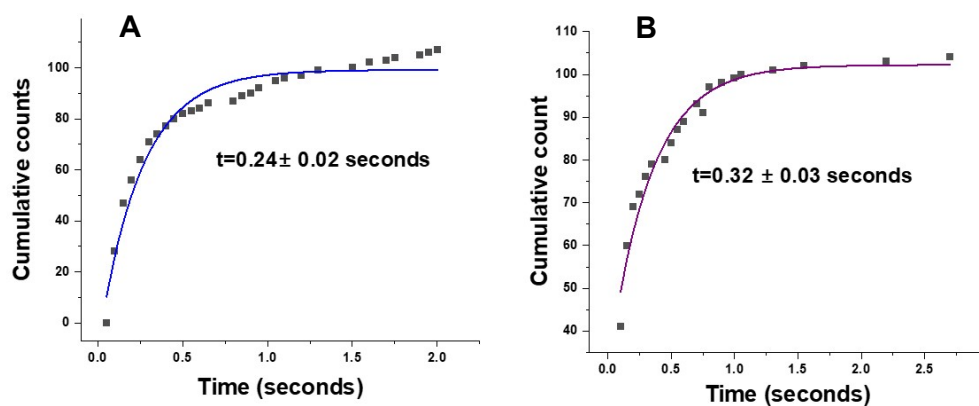

**Supplementary Fig. 4. NSF disassembly assay at higher (50ms) resolution. A)** Cumulated distribution showing average dwell time of the separated state present transiently before NSTx-Cy3 disassembles (n=106 traces). **B)** Cumulated distribution showing average dwell time of the separated state present transiently before NSN25-Cy5 disassembles (n=103 traces).

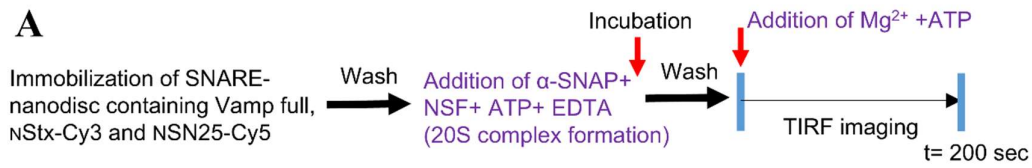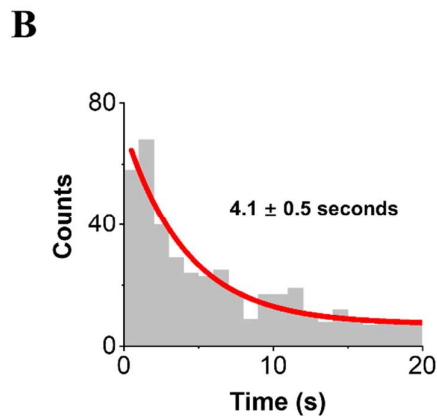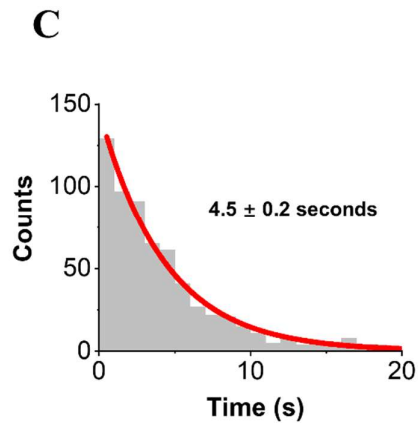

**Supplementary Fig. 5. 20S complex disassembly.** **A)** Procedure of the smFRET assay of 20S complex disassembly initiated by  $Mg^{2+}$  using TIRF microscope. **B)** A dwell time profile (nStx-Cy3) of the 20S complex disassembly upon the addition of  $Mg^{2+}$ . Dwell time  $t=4.1\pm 0.5$  seconds ( $n=4$  independent experiments) **C)** Dwell time profile (nStx-Cy3) of SNARE complex disassembly by NSF carried out using procedure 2A in parallel to S5B. Dwell time  $t=4.5\pm 0.2$  seconds ( $n=4$  independent experiments).

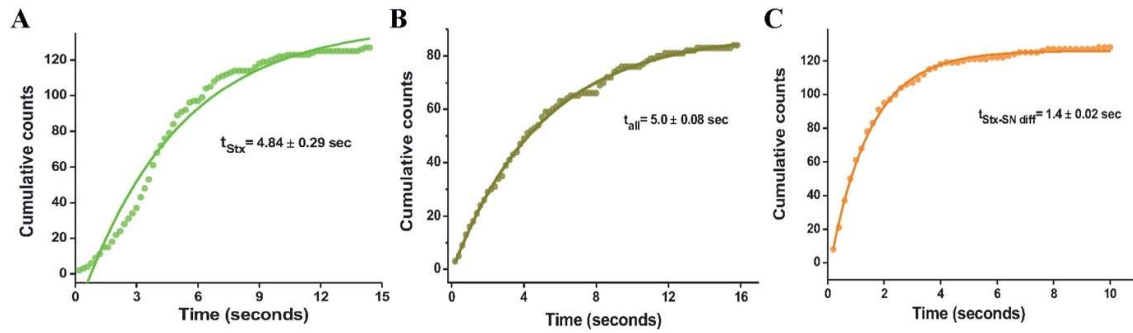

**Supplementary Fig. 6. Vamp anchored SNARE disassembly by NSF monitored using three-colour single-molecule FRET.** **A)** Cumulative distribution of latencies for the NStx-Cy3 leaving time ( $t_{\text{Stx}}$ ) in pathway II, Fig. 3H. **B)** Cumulative distribution of latencies for the pathway I, Fig. 3H, where NStx and NSN25 disassemble together from Vamp ( $t_{\text{all}}$ ). **C)** Cumulative distribution of the time difference between NStx and NSN25 disassembly ( $t_{\text{diff}}$ ) in pathway II.



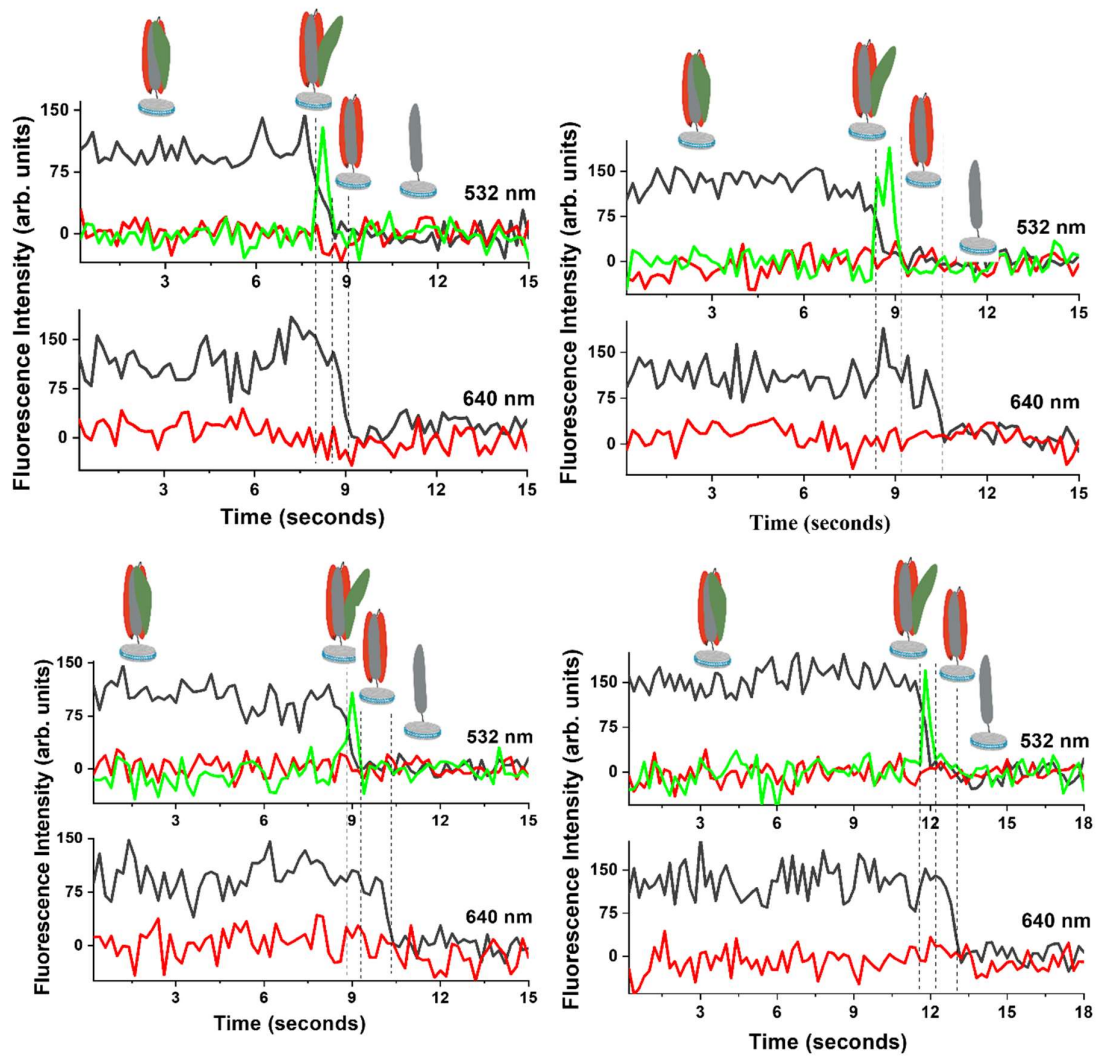

**Supplementary Fig. 7. Vamp anchored SNARE disassembly by NSF monitored using three-colour single-molecule FRET.** Real-time traces showing Vamp-anchored SNARE disassembly by NSF where NStx-Cy3 separation from the complex is observed before NStx disassembles first, followed by NSN-Cy5 (pathway II in Fig. 3H), along with the cartoon representation of the conformational states of SNARE complex.

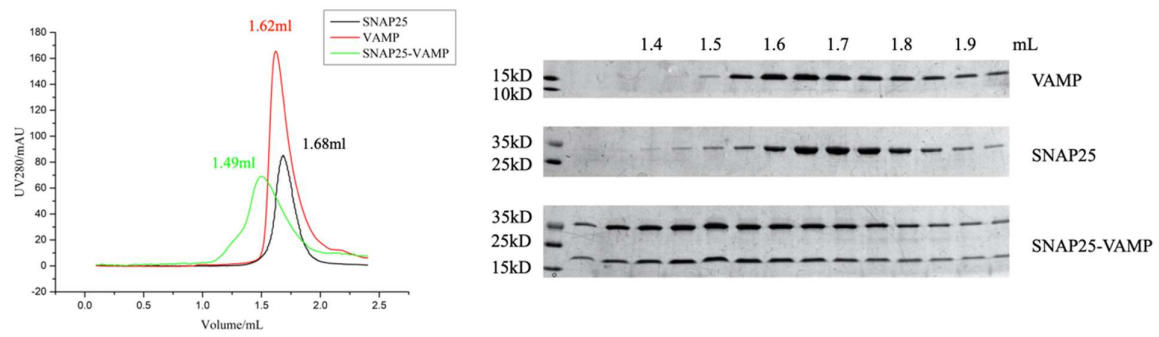

**Supplementary Fig. 8.** Vamp-SN25 binary complex formation verified by gel filtration chromatography (left panel) and SDS-PAGE corresponding to the peaks in the chromatogram (right panel).

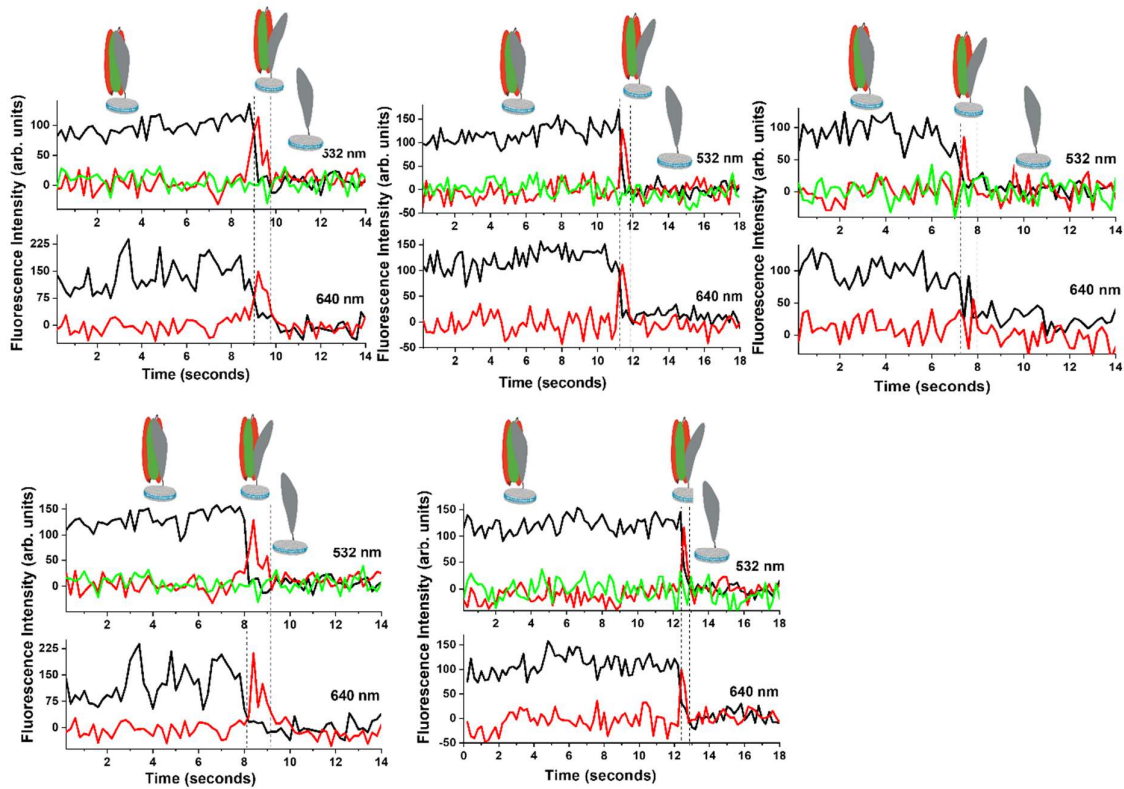

**Supplementary Fig. 9. Syntaxin anchored SNARE disassembly by NSF monitored using three-colour single-molecule FRET.** Real-time traces showing NStx-anchored SNARE disassembly by NSF, where a separation between NVamp-Cy3: NSN25-Cy5 from the NStx-Cy7 is observed before VAMP and NSN25 chains disassemble together from NStx (pathway II in Fig. 4I), along with the cartoon representation of the conformational states of SNARE complex.

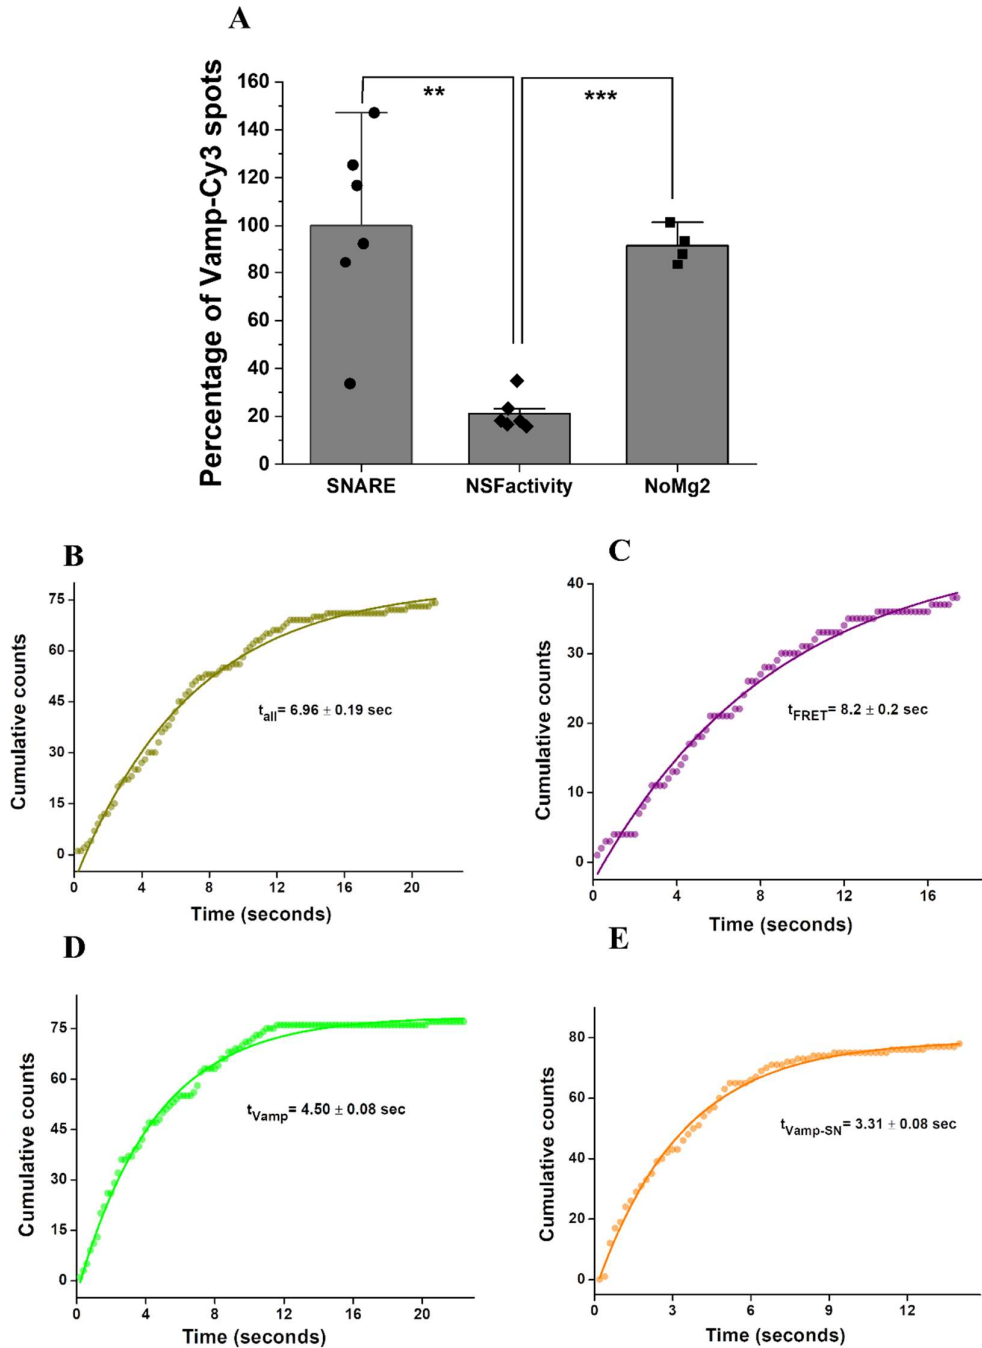

**Supplementary Fig. 10. Syntaxin anchored SNARE disassembly by NSF monitored using three-colour single-molecule FRET. A) Number of nVamp-Cy3 spots detected in the Cy3 channel under various experimental conditions, *SNARE*; Stx-anchored SNARE containing nVamp-Cy3, NSN-Cy5 and NSTx-Cy7 immobilized on the TIRFM surface, *NSF activity*; After**

the addition of  $\alpha$ -SNAP, NSF along with 2 mM ATP and 2 mM  $\text{MgCl}_2$ , *No  $\text{Mg}^{2+}$* ; After the addition of  $\alpha$ -SNAP, NSF along with 2 mM ATP, without  $\text{MgCl}_2$ . ) (n=6, independent SNARE disassembly experiments, p= \*\*\*<0.005 and \*\*<0.01, two-sided paired t-test.). **B**) Cumulative distribution of latencies for the pathway I, Fig. 4I, where VAMP and SN25 leave together from NStx ( $t_{\text{all}}$ ). **C**) Cumulative distribution of latencies for the FRET towards Cy7 disappearing before both chains leave in pathway II, Fig. 4I ( $t_{\text{FRET}}$ ). **D**) Cumulative distribution of NVamp-Cy3 leaving time after FRET disappearing in pathway III ( $t_{\text{vamp}}$ ). **E**) Cumulative distribution of the time difference between NVamp and NSN25 leaving in pathway III ( $t_{\text{vamp-SN}}$ ).

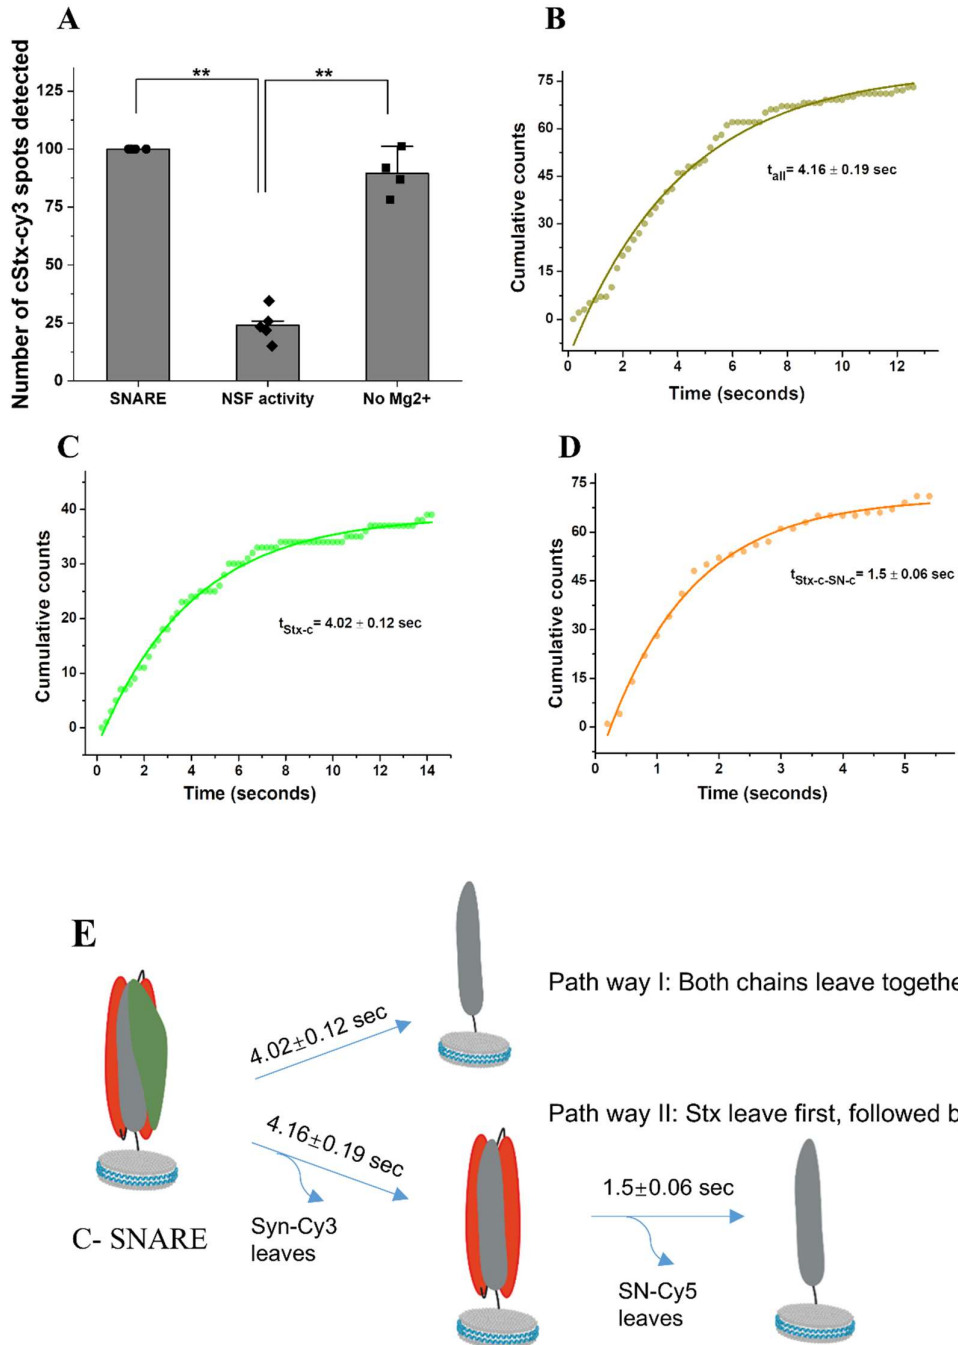

**Supplementary Fig. 11. Vamp anchored C-SNARE disassembly by NSF monitored using three-colour single-molecule FRET.** A) Number of cVamp-Cy3 spots detected in the Cy3 channel under various experimental conditions, *SNARE*; Vamp-anchored C-SNARE containing cStx-Cy3, cSN25-Cy5 and cVamp-Cy7 immobilized on the TIRFM surface, *NSF activity*; After the addition of  $\alpha$ -SNAP, NSF along with 2 mM ATP and 2 mM MgCl<sub>2</sub>, *No Mg<sup>2+</sup>*;

After the addition of  $\alpha$ -SNAP, NSF along with 2 mM ATP, without  $MgCl_2$ . ) (n=5-6, independent SNARE disassembly experiments,  $p = ** < 0.01$ , two-sided paired t-test.). **B)** Cumulative distribution of latencies for the pathway I shown in F, where cStx and cSN25 leave together from cVamp ( $t_{all}$ ). **C)** Cumulative distribution of cStx-Cy3 leaving time in pathway II shown in F ( $t_{Stx-c}$ ). **D)** Cumulative distribution of the time difference between cStx and cSN25 leaving ( $t_{Stx-c-SN-c}$ ) in C-SNARE disassembly by NSF. **E)** Pictorial representation of two pathways of SNARE disassembly by NSF under our experimental design. Pathway I, showing cStx and cSN25 disassembly together from cVamp (42%) and Pathway II, where cStx disassembles first, followed by cSN (47%).

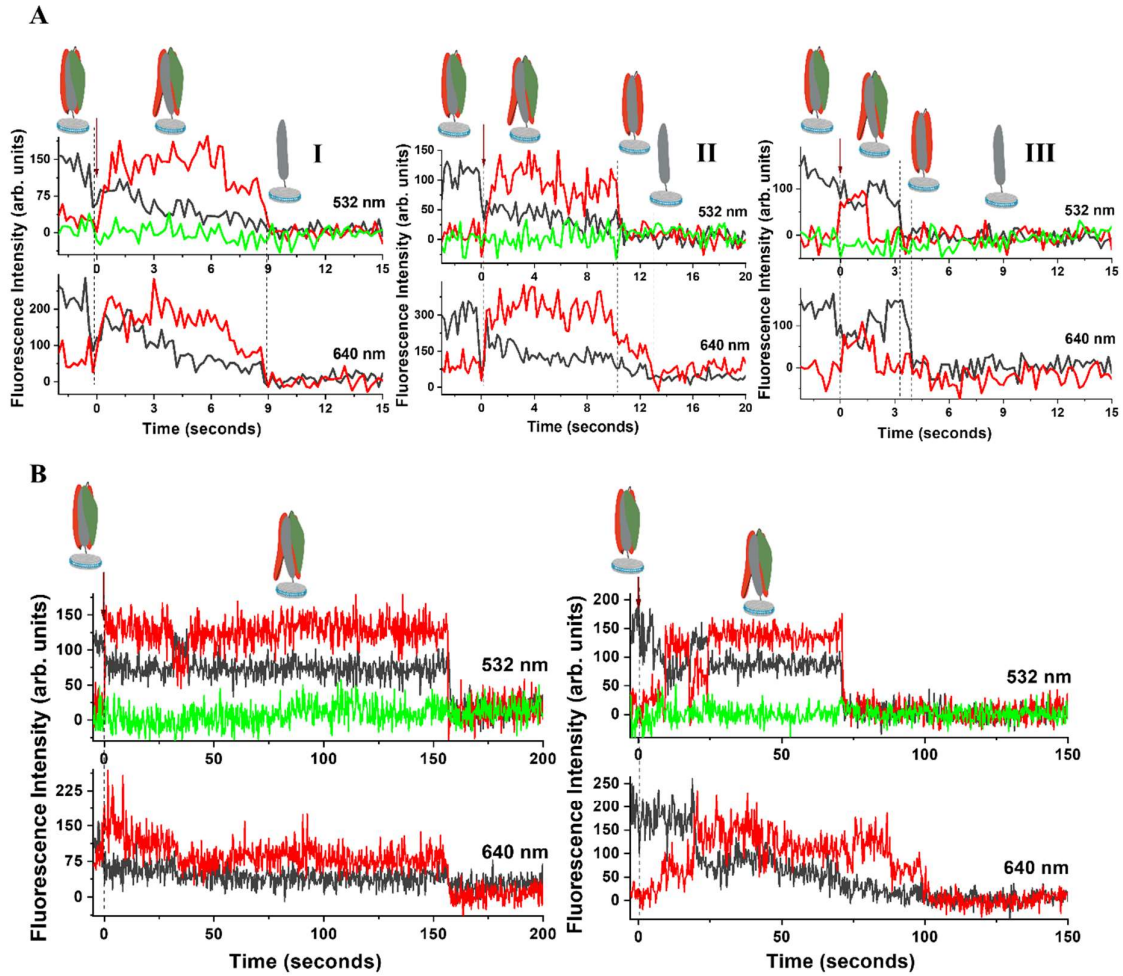

**Supplementary Fig. 12. Vamp anchored C-SNARE-nanodisc disassembly by NSF monitored using three-colour single-molecule FRET. A) Real-time traces showing disassembly by NSF showing flexible nature at the C-terminal end of the Vamp-anchored C-SNARE during the disassembly with change in FRET. B) Real-time single-molecule traces showing change in intensity upon the addition of  $\alpha$ -SNAP to the C-SNARE. Dotted line with arrow indicates the addition of  $\alpha$ -SNAP.**



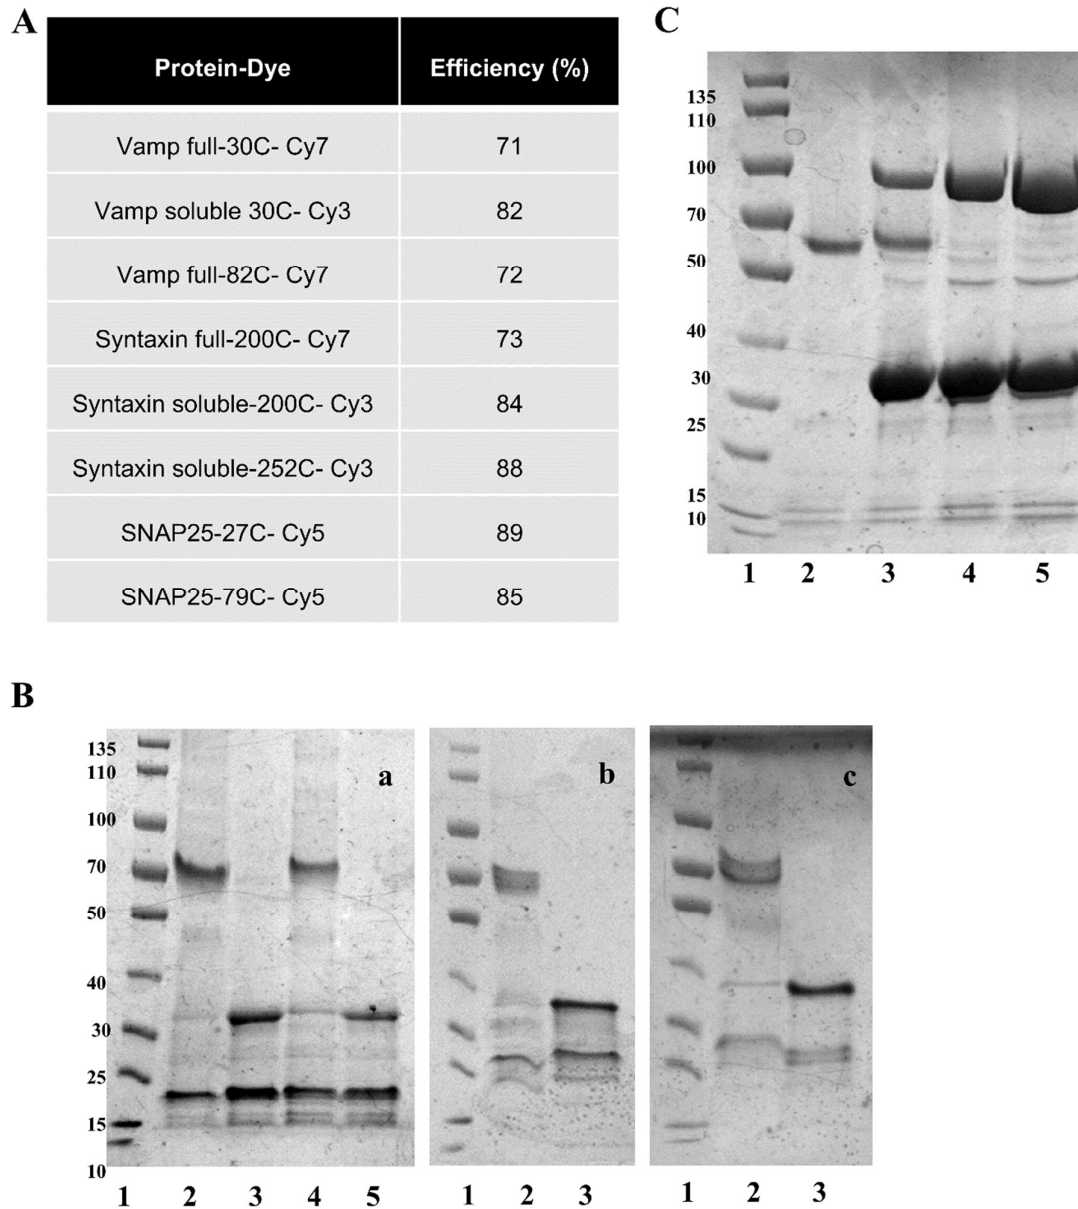

**Supplementary Fig. 13: SNARE complex reconstitution and disassembly monitored using SDS-PAGE.** (A) Labelling efficiency of SNARE proteins with the cyanine maleimide dyes. (B) SDS- PAGE gels showing- **a**) Marker (lane 1); Vamp-full SNARE at ~70kDa (lane 2); SNARE disassembly after the heating (lane 3); SNARE after urea wash (lane 4) and SNARE disassembly after the heating (lane 5), **b**) Marker (lane 1); Syntaxin-full SNARE after urea

wash (lane 2) and SNARE disassembly after the heating (lane 3), c) Marker (lane 1); Vamp-full C-SNARE after urea wash (lane 2) and SNARE disassembly after the heating (lane 3).

(C) SNARE disassembly by NSF. SDS- PAGE gels showing- Marker (lane 1), Vamp full SNARE (with His- tags removed) at ~70kDa (lane 2), SNARE in the presence of  $\alpha$ -SNAP, NSF and ATP-EDTA (lane 3), SNARE in the presence of  $\alpha$ -SNAP, NSF (2  $\mu$ g), ATP and  $Mg^{2+}$  (lane 4), SNARE in the presence of  $\alpha$ -SNAP, NSF (5  $\mu$ g), ATP and  $Mg^{2+}$  (lane 5).

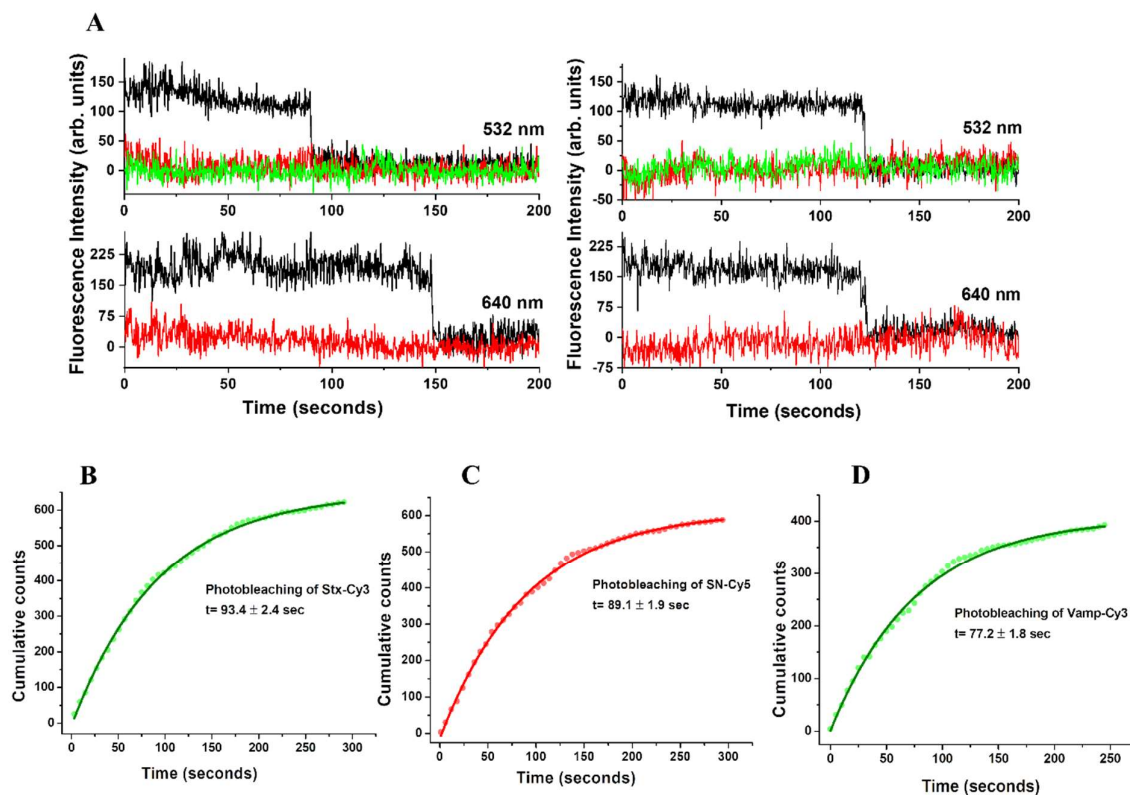

**Supplementary Fig. 14. Photobleaching analysis of the three-colour SNARE complexes.**

**A)** Single-molecule trajectories of the NStx-Cy3 (green), NSN-Cy5 (red) and NVamp-Cy7 (grey) during photobleaching in the presence of oxygen scavenging buffer. **B-D)** Graphs showing cumulative distribution of latencies for the photobleaching of NStx-Cy3, NSN-Cy5 in Vamp anchored and NVamp-Cy3 in Syntaxin anchored SNARE complexes in the presence of oxygen scavenging buffer, respectively.

**Supplementary Table 1: Amino acid sequences of the SNARE proteins used in the study.**

**All the mutations compared to the wild type are shown in red.**

| <b>Protein</b>        | <b>Sequence</b>                                                                                                                                                                                                                                                                                                                                                          |
|-----------------------|--------------------------------------------------------------------------------------------------------------------------------------------------------------------------------------------------------------------------------------------------------------------------------------------------------------------------------------------------------------------------|
| Vamp full-30C         | GSHMSATAATVPPAAPAGEGGPPAPPPNLTSN <b>C</b> RLLQQTQAQVDEVVDIMR<br>VNVDKVLERDQKLSELDDRADALQAGASQFETSAAKLKRKYWWKNLKMII<br>LGV <b>S</b> AIIIIIIIVYFST                                                                                                                                                                                                                         |
| Vamp full-82C         | GSHMSATAATVPPAAPAGEGGPPAPPPNLTSNRRLLQQTQAQVDEVVDIMR<br>VNVDKVLERDQKLSELDDRADALQAGASQFETSA <b>C</b> KLKRKYWWKNLKMII<br>ILGV <b>S</b> AIIIIIIIVYFST                                                                                                                                                                                                                        |
| Vamp soluble-30C      | GSHMSATAATVPPAAPAGEGGPPAPPPNLTSN <b>C</b> RLLQQTQAQVDEVVDIMR<br>VNVDKVLERDQKLSELDDRADALQAGASQFETSAAKLKRKYWWKNL <b>K</b>                                                                                                                                                                                                                                                  |
| Syntaxin full-200C    | MKDRTQELRTAKSDDDDDVTVTVD <del>DR</del> DRFMDEFFEQVEEIRGFIDKIAENV<br>EEVKKRHSAILASPNPDEKTKEELEELMSDIKKTANKVRSKLSIEQSIEQEE<br>GLNRSSADLRIRKTQHSTLSRKFEVVMSEYNATQSDYRER <b>S</b> KGRIQRQLEIT<br>GR <del>TTT</del> SEELEDMLESGNPAIFASGIIMDSSISKQAL <b>C</b> EIETRHSEIIKLENSIRE<br>LHDMFMDMAMLVESQGEMIDRIEYNVEHAVDYVERAVSDTKKAVKYQSKA<br>RRKKIMIII <b>SS</b> VILGIIIASTIGGIFG |
| Syntaxin soluble-200C | MKDRTQELRTAKSDDDDDVTVTVD <del>DR</del> DRFMDEFFEQVEEIRGFIDKIAENV<br>EEVKKRHSAILASPNPDEKTKEELEELMSDIKKTANKVRSKLSIEQSIEQEE<br>GLNRSSADLRIRKTQHSTLSRKFEVVMSEYNATQSDYRER <b>S</b> KGRIQRQLEIT<br>GR <del>TTT</del> SEELEDMLESGNPAIFASGIIMDSSISKQAL <b>C</b> EIETRHSEIIKLENSIRE<br>LHDMFMDMAMLVESQGEMIDRIEYNVEHAVDYVERAVSDTK <b>K</b>                                         |
| Syntaxin soluble-252C | MKDRTQELRTAKSDDDDDVTVTVD <del>DR</del> DRFMDEFFEQVEEIRGFIDKIAENV<br>EEVKKRHSAILASPNPDEKTKEELEELMSDIKKTANKVRSKLSIEQSIEQEE<br>GLNRSSADLRIRKTQHSTLSRKFEVVMSEYNATQSDYRER <b>S</b> KGRIQRQLEIT<br>GR <del>TTT</del> SEELEDMLESGNPAIFASGIIMDSSISKQAL <b>S</b> EIETRHSEIIKLENSIRE<br>LHDMFMDMAMLVESQGEMIDRIEYNVEHAVDYVERAVSDT <b>CKA</b>                                        |
| SNAP25-27C            | GSHMASMTGGQQMGRGSEFMAEDADMRNEEEMQRRADQLADESL <b>C</b> ST<br>RRMLQLVEESKDAGIRTLVMLDEQGEQLERIEEGMDQINKDMKEAEKNLTD<br>LGKF <b>S</b> GL <b>S</b> V <b>S</b> PNKLNKSSDAYKKAWGNNQDGVVASQPARVVDEREQMAIS<br>GGFIRRVTDARENEMDENLEQVSGIIGNLRHMALDMGNEIDTQNRQIDRI<br>MEKADSNKTRIDEANQRATKMLGSG                                                                                      |
| SNAP25-79C            | GSHMASMTGGQQMGRGSEFMAEDADMRNEEEMQRRADQLADESLEST<br>RRMLQLVEESKDAGIRTLVMLDEQGEQLERIEEGMDQINKDMKEAEKNL <b>CD</b><br>LGKF <b>S</b> GL <b>S</b> V <b>S</b> PNKLNKSSDAYKKAWGNNQDGVVASQPARVVDEREQMAIS<br>GGFIRRVTDARENEMDENLEQVSGIIGNLRHMALDMGNEIDTQNRQIDRI<br>MEKADSNKTRIDEANQRATKMLGSG                                                                                       |

**Supplementary Table 2: Sequences of the primers used to generate desired protein mutants used in the study.**

| <b>Primer name</b> | <b>Sequence</b>                              |
|--------------------|----------------------------------------------|
| Stxsol C143S F     | TACCGAGAACGCTCAAAGGG                         |
| Stxsol C143S R     | TCTTGCGAGTTTTCCCGCGTAG                       |
| Stxsol S200C F     | GAGACCAGGCACTGTGAGATCAT                      |
| Stxsol S200C R     | GGTCCGTGACACTCTAGTAGTTC                      |
| Stxsol- K252C F    | CGTGTCTGACACCAAGTGTTGACTC                    |
| Stxsol- K252C R    | ACACTTGGTGTCAGACACGGCCCTCT                   |
| pET28 C2S F        | GAAATAATTTTCGTTAACTTTAAGAAGG                 |
| pET28 C2S R        | CGAAAATTATTTCTAGAGGGGAA                      |
| SN25-T79C F        | AAAGAATTTGTGCGACCTAGGAAA                     |
| SN25-T79C R        | GCACAAATTCTTTTCTGCTTCTTTC                    |
| SN25 C27E F        | ATGAGTCCCTGGAAAGCACCCGTCGCAT                 |
| SN25 C27E R        | TTCCAGGGACTCATCAGCCAGCTGGTCA                 |
| SN25 E148C F       | GAGATGGATTGTAACCTGGAGCAG                     |
| SN25 E148C R       | ACAATCCATCTCATTTTCCCGGGCAT                   |
| SN25 C all S F     | GAAAATTCTCCGGGCTTTCTGTGTCTCCCTCTAACAAGCTTAAA |
| SN25 C all S R     | CTTGTTAGAGGGAGACACAGAAAGCCCGGAGAATTTTCCTAG   |
| VAMP R30C F        | ACCAGTAACTGCAGACTG                           |
| VAMP R30C R        | TGCTGCAGTCTGCAGTTA                           |
| VAMPfull C103S F   | TCTTGGGAGTGATTTTCAGCCA                       |
| VAMPfull C103S R   | GAGGATGATGGCTGAAATCAC                        |
| VAMP A82C F        | AGTGCATGTAAGCTCAAGCGCA                       |
| VAMP A82C R        | ACATGCACTTGTTTCAAACCTGGG                     |
