# Supplementary material for: Single-molecule two- and three-colour FRET studies reveal a transition state in SNARE disassembly by NSF
Source: PubMed Central journal article supplement — Nat Commun. 2025 Jan 2;16:250. doi: 10.1038/s41467-024-55531-0 (PMC11695992; doi:10.1038/s41467-024-55531-0), 2025-01-02
Supplement: 41467_2024_55531_MOESM2_ESM.pdf [file 41467_2024_55531_MOESM2_ESM.pdf]

Supplementary Data 1. The codes used to analyze Two-colour FRET traces and Three-colour FRET traces.

<Read me>

\*The code runs on Matlab versions 2017a or newer 2022b on Windows.

\*Copy the code and run.

\*Try testing the 'two-colour FRET traces' with 'two-colour FRET traces' code, a window with traces with will appear in about 1-2 minutes.

>code for Two-colour FRET trace analysis

```
function plotalextrace(path)
path='E:\Disc E\TIRFM analysis\Separation traces\save traces s\saved-traces';
close all;
close all hidden;
fclose('all');
judge=1;
fretline=0;
cd(path);
disp(path);
    timeunit=0.5*2;
savepath1=[path '/saved-traces-d'];
mkdir(savepath1);
savepath2=[path '/saved-traces-s'];
mkdir(savepath2);
savepath3=[path '/saved-traces-a'];
mkdir(savepath3);
savepath4=[path '/saved-traces-h'];
mkdir(savepath4);
savepath5=[path '/saved-traces-g'];
mkdir(savepath5);
savepath= [path '/saved-traces'];
mkdir(savepath);
A=dir;
numfiles=size(A);

figure;
hdl3=gcf;
k=1;
ks=[];
ksn=1;
%for i=1:numfiles,
while (k < numfiles(1))
    if A(k).isdir ~=0
        k=k+1;
    end
    if A(k).isdir == 0
        sigfname=A(k).name;    %sigfname is signal file name
        k=k+1;
        if (sigfname(end-2:end) == 'csv')
            %    if (sigfname(20:23) == 'pair')
                if (sigfname(16:19) == 'pair')
```

```

% if (sigfname(15:18) == 'pair')
%if (sigfname(1:4) == 'pair')
%   state=dlmread([sigfname(1:end-3) 'txt']);
%   if state(1) == judge
%       ks(ksn)=k;
%       ksn=ksn+1;
%       cd(path);
%       sigfid=fopen(sigfname,'r');           %signal file id
%       firstheaderline=textscan(sigfid, '%f:%f-%f, %f:%f-%f,');
%       temp1 = textscan(sigfid, '%f, %f, ,', 'headerlines', 1);
%       firstheaderline=textscan(sigfid, '%f:%f-%f, %f-%f, FRET');
%       temp1 = textscan(sigfid, '%f, %f, %f, ,', 'headerlines', 1);
%       firstheaderline=textscan(sigfid, '%f:%f-%f, %f-%f, FRET, ');
%       temp1 = textscan(sigfid, '%f, %f, %f,', 'headerlines', 1);
%       data1=cell2mat(temp1(2));
%       data2=cell2mat(temp1(1));
%       length=size(data1);

%       time=(1:length/2)*timeunit;
%       figure(hdl3);
%       subplot(3,1,1);
%       plot(time,data1(1:length/2),'g',time,data2(1:length/2),'b');%time,stdev,'r');
%       title(['Molecule ' num2str(k) ' of ' num2str(numfiles(1))]);
%       grid on;
%       zoom on;

%       temp=axis;
%       temp(1)=0;
%       temp(2)=100;
%       axis(temp);
%       grid on;
%       zoom on;

%       subplot(3,1,2);

%       plot(time,data1(length/2+1:length),'g',time,data2(length/2+1:length),'r');%time,stdev,'r');
%       grid on;
%       zoom on;
%       firstheaderline2=cell2mat(firstheaderline(1:4));
%       title([sigfname num2str(firstheaderline2)]);
%       temp=axis;
%       temp(1)=0;

```

```

%     temp(2)=100;
%     axis(temp);
%     grid on;
%     zoom on;

subplot(3,1,3);
fret=zeros(length);
%     fret=(data2/0.72)./(data1/0.59+data2/0.72);
fret=(data2)./(data1+data2);
fret=fret.*double((data1+data2)>fretline);
plot(time, fret(1:length/2), 'black');
title(['FRET']);
temp=axis;
temp(3)=0;
temp(4)=1;
axis(temp);
grid on;
zoom on;

reply=input('return to continue, f for fret, c for co-locol, b to go back ','s');
if reply=='h'
    copyfile(sigfname,savepath4);
    copyfile(sigfname,savepath);
    k=k;
end
if reply=='g'
    copyfile(sigfname,savepath5);
    copyfile(sigfname,savepath);
    k=k;
end
if reply=='d'
    copyfile(sigfname,savepath1);
    copyfile(sigfname,savepath);
    k=k;
end
if reply=='s'
    copyfile(sigfname,savepath2);
    copyfile(sigfname,savepath);
    k=k;
end
if reply=='a'
    copyfile(sigfname,savepath3);

```

```
        copyfile(sigfname,savepath);
        k=k;
    end
    if reply=='b'
        ksn=ksn-2;
        k=ks(ksn)-1;
    else
        k=k;
    end
    fclose(sigfid);
%    end
    end
    end
    end
end

fclose('all');
disp('done');
end
```

>code for Three-colour FRET trace analysis

```
function plotalextrace(path)
path='I:\SuiLab\Sudi\20190220\1102-000';
close all;
close all hidden;
fclose('all');
judge=1;
fretline=0;
cd(path);
disp(path);
    timeunit=0.5*2;
savepath1=[path '/saved-traces-d'];
mkdir(savepath1);
savepath2=[path '/saved-traces-s'];
mkdir(savepath2);
savepath3=[path '/saved-traces-a'];
mkdir(savepath3);
savepath4=[path '/saved-traces-h'];
mkdir(savepath4);
savepath5=[path '/saved-traces-g'];
mkdir(savepath5);
savepath= [path '/saved-traces'];
mkdir(savepath);
A=dir;
numfiles=size(A);

figure;
hdl3=gcf;
k=1;
ks=[];
ksn=1;
%for i=1:numfiles,
while (k < numfiles(1))
    if A(k).isdir ~=0
        k=k+1;
    end
    if A(k).isdir == 0
        sigfname=A(k).name;    %sigfname is signal file name
        k=k+1;
        if (sigfname(end-2:end) == 'csv')
            %    if (sigfname(20:23) == 'pair')
                if (sigfname(16:19) == 'pair')
```

```

% if (sigfname(15:18) == 'pair')
%if (sigfname(1:4) == 'pair')
%   state=dlmread([sigfname(1:end-3) 'txt']);
%   if state(1) == judge
%       ks(ksn)=k;
%       ksn=ksn+1;
%       cd(path);
%       sigfid=fopen(sigfname,'r');           %signal file id
%       firstheaderline=textscan(sigfid, '%f:%f-%f, %f:%f-%f, %f:%f-%f,');
%       temp1 = textscan(sigfid, '%f, %f, %f, ', 'headerlines', 1);
%       firstheaderline=textscan(sigfid, '%f:%f-%f, %f-%f, FRET');
%       temp1 = textscan(sigfid, '%f, %f, %f, ', 'headerlines', 1);
%       firstheaderline=textscan(sigfid, '%f:%f-%f, %f-%f, FRET, ');
%       temp1 = textscan(sigfid, '%f, %f, %f, ', 'headerlines', 1);
%       data1=cell2mat(temp1(2));
%       data2=cell2mat(temp1(1));
%       data3=cell2mat(temp1(3));
%       length=size(data1);

%       time=(1:length/2)*timeunit;
%       figure(hdl3);
%       subplot(2,1,1);

%       plot(time,data1(1:length/2),'g',time,data2(1:length/2),'blue',time,data3(1:length/2),'black');%,time,
%       stdev,'r');
%       title(['Molecule ' num2str(k) ' of ' num2str(numfiles(1))]);
%       grid on;
%       zoom on;

%       temp=axis;
%       temp(1)=0;
%       temp(2)=100;
%       axis(temp);
%       grid on;
%       zoom on;

%       subplot(2,1,2);

%       plot(time,data1(length/2+1:length),'g',time,data2(length/2+1:length),'blue',time,data3(length/
%       2+1:length),'black');%,time,stdev,'r');
%       grid on;
%       zoom on;

```



```

%      firstheaderline2=cell2mat(firstheaderline(1:4));
% title([sigfname num2str(firstheaderline2)]);
%      temp=axis;
%      temp(1)=0;
%      temp(2)=100;
%      axis(temp);
%      grid on;
%      zoom on;

%      subplot(3,1,3);
%      fret=zeros(length);
% %      fret=(data2/0.72)./(data1/0.59+data2/0.72);
%      fret35=(data1(1:length))./(data1(1:length)+data2(1:length));
%      fret37=(data3(1:length))./(data3(1:length)+data2(1:length));
%      fret57=(data3(1:length))./(data1(1:length)+data3(1:length));
%      fret=fret.*double((data1(1:length)+data2(1:length))>fretline);
%      plot(time, fret35(1:length), 'b', time, fret37(1:length),
%      'red', time, fret57(1:length),'black');, time, stdev, 'r';
%      title(['FRET']);
%      temp=axis;
%      temp(3)=0;
%      temp(4)=1;
%      axis(temp);
%      grid on;
%      zoom on;

reply=input('return to continue, f for fret, c for co-locol, b to go back ', 's');
if reply=='h'
    copyfile(sigfname,savepath4);
    copyfile(sigfname,savepath);
    k=k;
end
if reply=='g'
    copyfile(sigfname,savepath5);
    copyfile(sigfname,savepath);
    k=k;
end
if reply=='d'
    copyfile(sigfname,savepath1);
    copyfile(sigfname,savepath);
    k=k;
end
end

```

```
    if reply=='s'
        copyfile(sigfname,savepath2);
        copyfile(sigfname,savepath);
        k=k;
    end
    if reply=='a'
        copyfile(sigfname,savepath3);
        copyfile(sigfname,savepath);
        k=k;
    end
    if reply=='b'
        ksn=ksn-2;
        k=ks(ksn)-1;
    else
        k=k;
    end
    fclose(sigfid);
%   end
end
end
end
end

fclose('all');
disp('done');
end
```
