# Supplementary material for: Single-molecule two- and three-colour FRET studies reveal a transition state in SNARE disassembly by NSF
Source: PubMed Central journal article supplement — Nat Commun. 2025 Jan 2;16:250. doi: 10.1038/s41467-024-55531-0 (PMC11695992; doi:10.1038/s41467-024-55531-0), 2025-01-02
Supplement: 41467_2024_55531_MOESM4_ESM.pdf [file 41467_2024_55531_MOESM4_ESM.pdf]

Supplementary Data 1. The codes used to analyze Two-colour FRET traces and Three-colour FRET traces.
